# Supplementary material for: Multi-modal visual tracking: Review and experimental comparison
Source: Springer Nature journal article supplement (doi:10.1007/s41095-023-0345-5), 2024-01-03
Supplement: 41095_2023_345_MOESM1_ESM.pdf [file 41095_2023_345_MOESM1_ESM.pdf]

## Supplementary Material of Multi-modal Visual Tracking: Review and Experimental Comparison

Pengyu Zhang<sup>1</sup>, Dong Wang(✉)<sup>1</sup>, and Huchuan Lu<sup>1</sup>

© The Author(s)

### Abstract

### Keywords

Due to the page limitation, we describe the additional details in this supplementary material. In the section 1, we introduce the attribute annotation in RGB-D and RGB-T datasets and we depict the attribute-based performance in RGBT234 dataset in section 2. Finally, we provide a detailed description of multi-modal tracking following the taxonomy in section 3.

### 1 Introduction of the attributes in STC and RGBT234 datasets

In this section, taking STC and RGBT234 as example, we detail the attribute annotation in RGB-D and RGB-T datasets. As for STC dataset, 10 types of attribute are annotated, including illumination variation, depth variation, scale variation, depth distribution variation, surrounding depth clutter, surrounding color clutter, background color camouflages, background shape camouflages and partial occlusion. RGBT234 dataset contains 12 attributes, including no occlusion, partial occlusion, heavy occlusion, low illumination, low resolution, thermal crossover, deformation, fast motion, scale variation, motion blur, camera moving and background clutter. The detailed description of attributes in both two datasets are shown in Table 1 and Table 2, respectively.

### 2 Attribute-based Comparison on RGBT234 dataset

Here, we give the detailed results with respect to attribute-based comparison on RGBT234 dataset, shown in Figure 1. Two mainstream frameworks, including deep learning based method and CF tracker obtain very competitive results according to attribute-based performance. Improved MDNet-based tracker, i.e. CMPP, shows superior performance in 6 attributes, such as low resolution, deformation, background clutter, thermal crossover, fast motion and heavy occlusion.

JMMAC models both appearance and motion cues in a unified framework, thereby achieving satisfying performance in camera moving and partial occlusion. Furthermore, CF based trackers is more capable of handling scale variation than MDNet variants.

### 3 Detailed description of multi-modal trackers

We provide an in-depth description on multi-modal trackers. Following the taxonomy in the main paper, we summarize existing RGB-D and RGB-T tracking methods in Table 4 and Table 5 from various aspects, including, tracking framework, learning paradigm, feature type, auxiliary modality purpose. Furthermore, the public resources for multi-modal tracking are concluded in Table 3 for further research.

**Table 1** Description of attributes annotated in the STC dataset.

| Attribute | Description                                                                                         |
|-----------|-----------------------------------------------------------------------------------------------------|
| IV        | Illumination Variation – RGB intensity change of the target (mean value).                           |
| DV        | Depth Variation – depth change of the target (mean value).                                          |
| SV        | Scale Variation – scale change of the bounding box (relative ratio).                                |
| CDV       | Color Distribution Variation – RGB distribution change of the target.                               |
| DDV       | Depth Distribution Variation – depth distribution change of the target.                             |
| SDC       | Surrounding Depth Clutter – depth similarity between the target and contextual region (mean value). |
| SCC       | Surrounding Color Clutter – RGB intensity similarity between the target and contextual region.      |
| BCC       | Background Color Camouflages – The distractor has a similar color as the target.                    |
| BSC       | Background Shape Camouflages – The distractor has a similar shape as the target.                    |
| PO        | Partial Occlusion – A part of the target is obstructed.                                             |

**Table 2** Description of attributes annotated in RGBT210 and RGBT234 datasets.

| Attribute | Description                                                                                               |
|-----------|-----------------------------------------------------------------------------------------------------------|
| NO        | No Occlusion – The target is not occluded.                                                                |
| PO        | Partial Occlusion – The target is partially occluded.                                                     |
| HO        | Heavy Occlusion – over 80% of the target region is occluded.                                              |
| LI        | Low Illumination – The illumination in the target is low.                                                 |
| LR        | Low Resolution – The resolution in the target is low.                                                     |
| TC        | Thermal Crossover – The target has similar temperature with other objects or background.                  |
| DEF       | Deformation – Non-rigid object deformation.                                                               |
| FM        | Fast Motion – The target movement is larger than 20 pixels between two adjacent frames.                   |
| SV        | Scale Variation – Compared with the initial target patch, the ratio of the target varies in a wide range. |
| MB        | Motion Blur – The target object motion results in the blur image information.                             |
| CM        | Camera Moving – The target object is captured by a moving camera.                                         |
| BC        | Background Clutter – The distractor has a similar color or shape as the target.                           |

**Table 3** Public resources for RGB-T and RGB-D tracking.

|       |         | Method                                          | links                                                                                                                                                                                                                                                                                                                                                                                                                                                                                                                                                                                                                                                                                                                        |
|-------|---------|-------------------------------------------------|------------------------------------------------------------------------------------------------------------------------------------------------------------------------------------------------------------------------------------------------------------------------------------------------------------------------------------------------------------------------------------------------------------------------------------------------------------------------------------------------------------------------------------------------------------------------------------------------------------------------------------------------------------------------------------------------------------------------------|
| RGB-D | Tracker | 3DT<br>OTR<br>DSOH<br>DSKCF<br>ARDM<br>CSR-RGBD | <a href="https://github.com/adelbibi/3D-Part-Based-Sparse-Tracker-with-Automatic-Synchronization-and-Registration">https://github.com/adelbibi/3D-Part-Based-Sparse-Tracker-with-Automatic-Synchronization-and-Registration</a><br><a href="https://github.com/ugurkart/OTR">https://github.com/ugurkart/OTR</a><br><a href="https://github.com/mcamplan/DSKCF_BMVC2015">https://github.com/mcamplan/DSKCF_BMVC2015</a><br><a href="https://github.com/mcamplan/DSKCF_JRTIP2016">https://github.com/mcamplan/DSKCF_JRTIP2016</a><br><a href="https://github.com/shine636363/RGBDtracker">https://github.com/shine636363/RGBDtracker</a><br><a href="http://tracking.cs.princeton.edu/">http://tracking.cs.princeton.edu/</a> |
|       | Dataset | PTB<br>STC<br>CDTB                              | <a href="http://tracking.cs.princeton.edu/">http://tracking.cs.princeton.edu/</a><br><a href="https://beardatashare.bham.ac.uk/dl/fiVnhJRjkyNN8QjSAoiGSiBY/RGBDdataset.zip">https://beardatashare.bham.ac.uk/dl/fiVnhJRjkyNN8QjSAoiGSiBY/RGBDdataset.zip</a><br><a href="https://www.vicos.si/Projects/CDTB">https://www.vicos.si/Projects/CDTB</a>                                                                                                                                                                                                                                                                                                                                                                          |
| RGB-T | Tracker | MANet<br>mfDiMP                                 | <a href="https://github.com/Alexadlu/MANet">https://github.com/Alexadlu/MANet</a><br><a href="https://github.com/zhanglichao/end2end_rgbt_tracking">https://github.com/zhanglichao/end2end_rgbt_tracking</a>                                                                                                                                                                                                                                                                                                                                                                                                                                                                                                                 |
|       | Dataset | OTCBVS<br>LITIV<br>GTOT<br>RGBT234              | <a href="http://vcipl-okstate.org/pbvs/bench/">http://vcipl-okstate.org/pbvs/bench/</a><br><a href="https://www.polymtl.ca/litiv/en/codes-and-datasets">https://www.polymtl.ca/litiv/en/codes-and-datasets</a><br><a href="https://docs.google.com/uc?id=0B-Z6TyBF2ceIZ0c1anVhaHQ3MFk&amp;export=download">https://docs.google.com/uc?id=0B-Z6TyBF2ceIZ0c1anVhaHQ3MFk&amp;export=download</a><br><a href="https://sites.google.com/view/ahutracking001/">https://sites.google.com/view/ahutracking001/</a>                                                                                                                                                                                                                   |

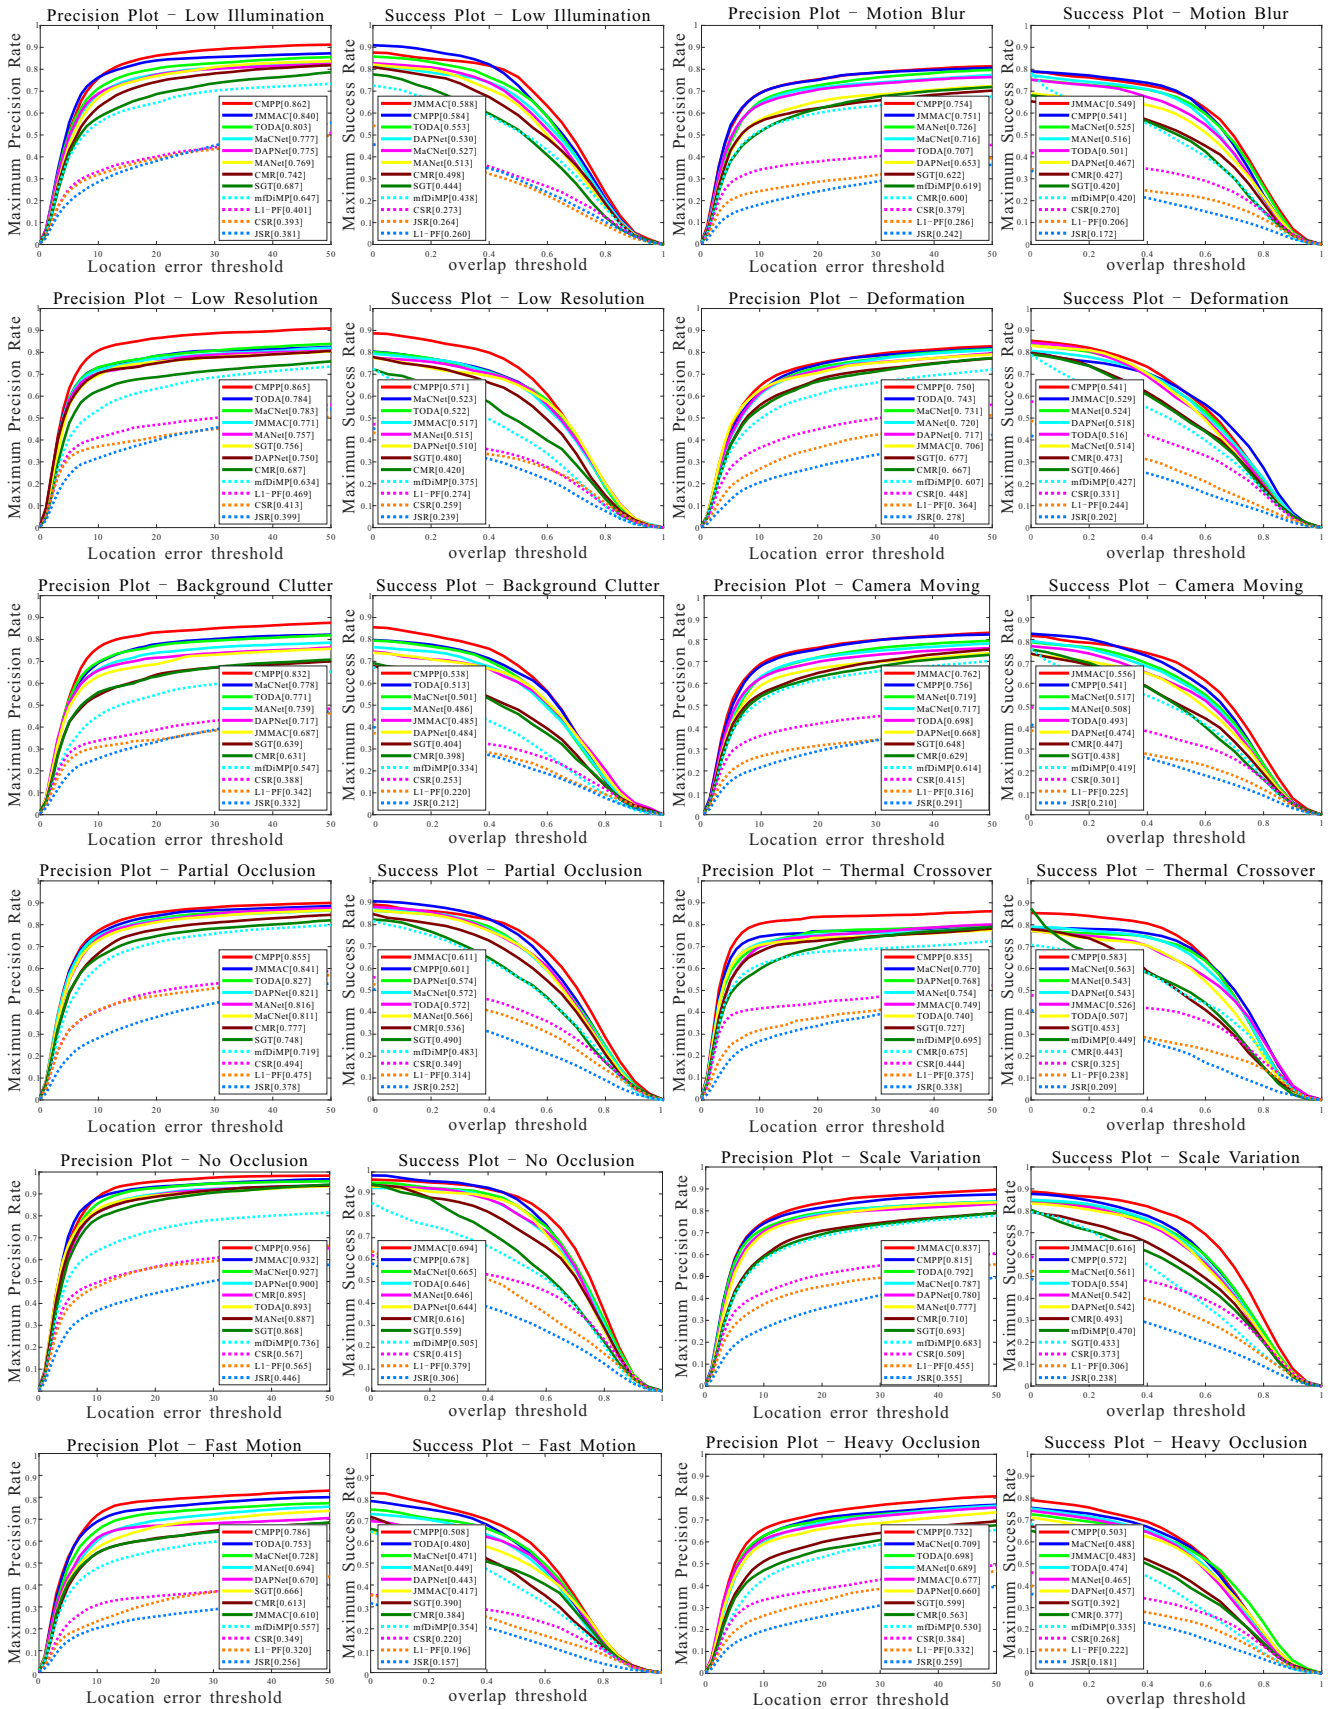

Fig. 1 Attribute-based Comparison on RGBT234.

**Table 4** Detailed descriptions of RGB-D trackers.

|       | Year       | Trackers      | Framework   | Learning Paradigm | Feature Type                                                         | Auxiliary Modality Purpose                           | Publication |
|-------|------------|---------------|-------------|-------------------|----------------------------------------------------------------------|------------------------------------------------------|-------------|
| RGB-D | 2012       | AMCT [1]      | PF          | Online learning   | Scalable Gradient [2],<br>Color Averages                             | Feature                                              | JDOS        |
|       | 2014       | MCBT [3]      | Dis. Others | Off-the-shelf     | Optical Flow [4],<br>Color Histograms [5]                            | Feature                                              | Neu.        |
|       | 2015       | ISOD [6]      | Dis. Others | Online learning   | Intensity                                                            | Occlusion reasoning                                  | SP          |
|       |            | DSOH [7]      | CF          | Online learning   | HOG [8]                                                              | Feature, Scale estimation,<br>Occlusion Reasoning    | BMVC        |
|       |            | DOHR [9]      | Dis. Others | Online learning   | Haar-like [10]                                                       | Feature,<br>Occlusion reasoning                      | FSKD        |
|       |            | CDG [11]      | Dis. Others | Online learning   | Depth Gradient,<br>HOG,<br>Depth Gradient Flow,<br>Optical Flow [12] | Feature,<br>Occlusion Reasoning                      | CAC         |
|       |            | OL3DC [13]    | Dis. Others | Off-the-shelf     | SURF [14]                                                            | 3D Reconstruction,<br>Occlusion Reasoning            | Neu.        |
|       |            | 2016          | DLST [15]   | CF                | Online learning                                                      | HOG,<br>Color Names [16]                             | Feature     |
|       | DSKCF [17] |               | CF          | Online learning   | HOG                                                                  | Feature,<br>Occlusion Reasoning,<br>Scale Estimation | RTIP        |
|       | 3DT [18]   |               | PF          | Online learning   | Color Names,<br>3D shape [19]                                        | 3D Reconstruction,<br>Occlusion Reasoning            | CVPR        |
|       | OAPF [20]  |               | PF          | Online learning   | HOG, LBP, raw pixel,<br>LoG, depth                                   | Feature,<br>Occlusion Reasoning,<br>Scale Estimation | CVIU        |
|       | 2017       | ROTSL [21]    | PF          | Online learning   | Depth-enhanced<br>Color Feature                                      | Feature,<br>Occlusion Reasoning                      | ITEE        |
|       | 2018       | CSR-RGBD [22] | CF          | Online learning   | HOG, VGGNet-M [23]                                                   | Feature,<br>Occlusion Reasoning                      | ECCVW       |
|       |            | DMDCF [24]    | CF          | Online learning   | HOG,<br>Color Names,<br>Intensity                                    | Feature,<br>Occlusion Reasoning                      | ICPR        |
|       |            | SEOH [25]     | CF          | Online learning   | HOG, Intensity                                                       | Feature, Scale Estimation                            | Access      |
|       |            | ARDM [26]     | CF          | Online learning   | HOG, Color Names,<br>Color Histogram                                 | Feature                                              | TC          |
|       |            | OACPF [27]    | CF          | Online learning   | HOG                                                                  | Occlusion Reasoning,<br>Scale Estimation             | Access      |
|       |            | CCF [28]      | CF          | Online learning   | HOG,<br>Color Names,<br>Intensity                                    | Occlusion Reasoning,<br>Scale Estimation             | GSKI        |
|       |            | RTKCF [29]    | CF          | Online learning   | HOG, Color Names                                                     | Feature,<br>Occlusion Reasoning                      | CCDC        |
|       | 2019       | 3DMS [30]     | MS          | Online learning   | Color Histogram                                                      | 3D Reconstruction                                    | ICST        |
|       |            | OTR [31]      | CF          | Online learning   | HOG, Color Names                                                     | Feature,<br>3D Reconstruction                        | CVPR        |
|       |            | TACF [32]     | CF          | Online learning   | HOG, Color Names,<br>Lookup Table feature [33]                       | Feature,<br>Occlusion Reasoning                      | Sensors     |
|       |            | CA3DMS [34]   | MS          | Online learning   | Color Histogram                                                      | 3D Reconstruction,<br>Occlusion Reasoning            | TMM         |
|       |            | OTOD [35]     | DL          | Online learning   | PointNet [35]                                                        | 3D Reconstruction                                    | CIS         |
|       | 2020       | WCO [36]      | CF          | Online learning   | HOG, VGGNet-M                                                        | Feature                                              | Sensors     |

**Table 5** Detailed description of RGB-T trackers.

|          | Year           | Trackers        | Framework                         | Learning Paradigm                 | Feature Type                           | Auxiliary Modality Purpose  | Publication |            |
|----------|----------------|-----------------|-----------------------------------|-----------------------------------|----------------------------------------|-----------------------------|-------------|------------|
| RGB-T    | 2006           | CFM [37]        | Dis. Others                       | Online learning                   | Multi-dimensional Gaussian Feature     | Feature                     | ICIF        |            |
|          | 2007           | PLF [38]        | PF                                | Online learning                   | Colour Histogram                       | Feature                     | CVPR        |            |
|          | 2008           | MST [39]        | MS                                | Online learning                   | Color Spatiograms [40]                 | Feature                     | MVA         |            |
|          |                | PGM [41]        | Gen. Others                       | Online learning                   | Intensity                              | Feature                     | ISCS        |            |
|          | 2011           | JSR [42]        | PF                                | Online learning                   | Color Histogram, Intensity             | Feature                     | IS          |            |
|          |                | L1-PF [43]      | PF                                | Online learning                   | Intensity, Canny Edge Description [44] | Feature                     | ICIF        |            |
|          | 2016           | RT-LSR [45]     | SL                                | Online learning                   | Sparse feature                         | Feature                     | Multimedia  |            |
|          |                | CSR [46]        | SL                                | Online learning                   | Intensity                              | Feature                     | TIP         |            |
|          | 2017           | SGT [47]        | SL                                | Online learning                   | Sparse feature                         | Feature                     | Multimedia  |            |
|          |                | MLSR [48]       | SL                                | Online learning                   | Sparse feature                         | Feature                     | TSMCS       |            |
|          | 2018           | RCDL [49]       | SL                                | Online learning                   | HOG, Intensity                         | Feature                     | AAAI        |            |
|          |                | MSR [50]        | SL                                | Online learning                   | Sparse feature                         | Feature                     | PRL         |            |
|          |                | CMR [51]        | Dis. Others                       | Online learning                   | Raw pixel, intensity, HOG              | Feature                     | ECCV        |            |
|          |                | RMR [52]        | Dis. Others                       | Online learning                   | HOG, Color Histogram                   | Feature                     | SPIC        |            |
|          |                | LGMG [53]       | SL                                | Online learning                   | HOG, Color Histogram                   | Feature                     | TCSVT       |            |
|          |                | MDNet-RGBT [54] | DL                                | Online learning, Offline training | VGGNet-M                               | Feature                     | CISP        |            |
|          |                | FTSNet [55]     | CF                                | Online learning                   | VGGNet-16                              | Feature                     | Neu.        |            |
|          |                | CSCF [56]       | CF                                | Online learning                   | Intensity                              | Feature                     | BICS        |            |
|          |                | 2019            | DAPNet [57]                       | DL                                | Online learning, Offline training      | VGGNet-M                    | Feature     | Multimedia |
|          |                |                 | HTF [58]                          | CF                                | Online learning                        | HOG, Color Names, Intensity | Feature     | IPT        |
|          | LMCFT [59]     |                 | SL                                | Online learning                   | Sparse feature                         | Feature                     | TIE         |            |
|          | MANet [60]     |                 | DL                                | Online learning, Offline training | VGGNet-M                               | Feature                     | ICCVW       |            |
|          | TODA [61]      |                 | DL                                | Online learning, Offline training | VGGNet-M                               | Feature                     | ICIP        |            |
|          | DAFNet [62]    |                 | DL                                | Online learning, Offline training | VGGNet-M                               | Feature                     | ICCVW       |            |
|          | DiMP-RGBT [63] |                 | DL                                | Online learning, Offline training | ResNet-101 [64]                        | Feature                     | ICCVW       |            |
|          | ONMF [65]      |                 | SL                                | Online learning                   | Sparse feature                         | Feature                     | Access      |            |
|          | 2020           | CMPP [66]       | DL                                | Online learning, Offline training | VGGNet-M                               | Feature                     | CVPR        |            |
|          |                | MaCNet [67]     | DL                                | Online learning, Offline training | VGGNet-M                               | Feature                     | Sensors     |            |
| CAT [68] |                | DL              | Online learning, Offline training | VGGNet-M                          | Feature                                | ECCV                        |             |            |
| 2021     | JMMAC [69]     | CF              | Online learning, Offline training | VGGNet-M                          | Feature, Occlusion Reasoning           | TIP                         |             |            |



## References

- [1] Garcia GM, Klein DA, Stuckler J. Adaptive Multi-cue 3D Tracking of Arbitrary Objects. In *Joint DAGM and OAGM Symposium*, 2012, 357–366.
- [2] Klein DA, Cremers AB. Boosting Scalable Gradient Features for Adaptive Real-Time Tracking. In *International Conference on Robotics and Automation*, 2011, 4411–4416.
- [3] Wang Q, Fang J, Yuan Y. Multi-cue Based Tracking. *Neurocomputing*, 2014, 131: 227–236.
- [4] Brox T, Bruhn A, Papenbergh N, Weickert J. High Accuracy Optical Flow Estimation Based on a Theory for Warping. In *European Conference on Computer Vision*, 2004, 25–36.
- [5] Porikli FM. Integral Histogram: a Fast Way to Extract Histograms in Cartesian Spaces. In *IEEE Conference on Computer Vision and Pattern Recognition*, 2005, 829–836.
- [6] Chen Y, Shen Y, Liu X, Zhong B. 3D object tracking via image sets and depth-based occlusion detection. *Signal Processing*, 2015, 112: 146–153.
- [7] Camplani M, Hannuna S, Mirmehdi M, Damen D, Paiement A, Tao L, Burghardt T. Real-time RGB-D Tracking with Depth Scaling Kernelised Correlation Filters and Occlusion Handling. In *British Machine Vision Conference*, 2015, 145.1–145.11.
- [8] Dalal N, Triggs B. Histograms of Oriented Gradients for Human Detection. In *IEEE Conference on Computer Vision and Pattern Recognition*, 2005, 886–893.
- [9] Ding P, Song Y. Robust Object Tracking using Color and Depth Images with a Depth based Occlusion Handling and Recovery. In *International Conference on Fuzzy Systems and Knowledge Discovery*, 2015, 930–935.
- [10] Viola P, Jones M. Rapid Object Detection using a Boosted Cascade of Simple Features. In *IEEE Conference on Computer Vision and Pattern Recognition*, 2001, 511–518.
- [11] Shi H, Gao C, Sang N. Using Consistency of Depth Gradient to Improve Visual Tracking in RGB-D Sequences. In *Chinese Automation Congress*, 2015, 518–522.
- [12] KPHorn B, GSchunck B. Determining Optical Flow. *Artificial Intelligence*, 1981, 17: 185–203.
- [13] Zhong B, Shen Y, Chen Y, Xie W, Cui Z, Zhang H, Chen D, Wang T, Liu X, Peng S, Gou J, Du J, Wang J, Zheng W. Online Learning 3D Context for Robust Visual Tracking. *Neurocomputing*, 2015, 151: 710–718.
- [14] Bay H, Ess A, Tuytelaars T, Gool LV. Speeded-Up Robust Features. *Computer Vision and Image Understanding*, 2008, 110: 346–359.
- [15] An N, Zhao XG, Hou ZG. Online RGB-D Tracking via Detection-Learning-Segmentation. In *International Conference on Pattern Recognition*, 2016, 1231–1236.
- [16] van de Weijer J, Schmid C, Schmid C, Larlus D. Learning Color Names for Real-World Applications. *IEEE Transactions on Image Processing*, 2009, 18(7): 1512–1523.
- [17] Hannuna S, Camplani M, Hall J, Mirmehdi M, Damen D, Burghardt T, Paiement A, Tao L. DS-KCF: a real-time tracker for RGB-D data. *Journal of Real-Time Image Processing*, 2019, 16: 1439–1458.
- [18] Bibi A, Zhang T, Ghanem B. 3D Part-Based Sparse Tracker with Automatic Synchronization and Registration. In *IEEE Conference on Computer Vision and Pattern Recognition*, 2016, 1439–1448.
- [19] Song S, Xiao J. Tracking Revisited using RGBD Camera: Unified Benchmark and Baselines. In *IEEE International Conference on Computer Vision*, 2013, 233–240.
- [20] Meshgi K, Ichi Maeda S, Oba S, Skibbe H, zhe Li Y, Ishii S. An Occlusion-aware Particle Filter Tracker to Handle Complex and Persistent Occlusions. *Computer Vision and Image Understanding*, 2016, 150: 81–94.
- [21] Ma Z, Xiang Z. Robust Object Tracking with RGBD-based Sparse Learning. *Frontiers of Information Technology and Electronic Engineering*, 2017, 18(7): 989–1001.
- [22] Kart U, Kamarainen JK, Matas J. How to Make an RGBD Tracker? In *European Conference on Computer Vision Workshop*, 2018, 148–161.
- [23] Simonyan K, Zisserman A. Very Deep Convolutional Networks for Large-Scale Image Recognition. In *International Conference on Learning Representations*, 2015, 1–14.
- [24] Kart U, Kamarainen JK, Matas J, Fan L, Cricri F. Depth Masked Discriminative Correlation Filter. In *International Conference on Pattern Recognition*, 2018, 2112–2117.
- [25] Leng J, Liu Y. Real-time RGB-D Visual Tracking with Scale Estimation and Occlusion Handling. *Access*, 2018, 6: 24256–24263.
- [26] Xiao J, Stolkin R, Gao Y, Leonardis A. Robust Fusion of Color and Depth Data for RGB-D Target Tracking Using Adaptive Range-Invariant Depth Models and Spatio-Temporal Consistency Constraints. *IEEE Transactions on Cybernetics*, 2018, 48(8): 2485–2499.
- [27] Zhai Y, Song P, Mou Z, Chen X, Liu X. Occlusion-Aware Correlation Particle Filter Target Tracking Based on RGBD Data. *Access*, 2018, 6: 50752–50764.
- [28] Li G, Huang L, Zhang P, Li Q, Huo Y. Depth Information Aided Constrained Correlation Filter for Visual Tracking. In *International Conference on Geo-Spatial Knowledge and Intelligence*, 2019, 1–10.
- [29] Zhang H, Cai M, Li J. A Real-time RGB-D tracker based on KCF. In *Chinese Control And Decision Conference*, 2018, 4856–4861.
- [30] Gutev A, Debono CJ. Exploiting Depth information to increase object tracking robustness. In *International Conference on Smart Technologies*, 2019, 1–5.
- [31] Kart U, Lukezic A, Kristan M, Kamarainen JK, Matas J. Object Tracking by Reconstruction with View-Specific Discriminative Correlation Filters. In *IEEE Conference on Computer Vision and Pattern Recognition*, 2019, 1339–1348.
- [32] Kuai Y, Wen G, Li D, Xiao J. Target-Aware Correlation Filter Tracking in RGBD Videos. *Sensors*, 2019, 19(20): 9522–9531.

- [33] Krizhevsky A, Sutskever I, Hinton GE. ImageNet Classification with Deep Convolutional Neural Networks. In *Advances in Neural Information Processing Systems*, 2012, 1106–1114.
- [34] Liu Y, Jing XY, Nie J, Gao H, Liu J. Context-Aware Three-Dimensional Mean-Shift With Occlusion Handling for Robust Object Tracking in RGB-D Videos. *IEEE Transactions on Multimedia*, 2019, 21(3): 664–677.
- [35] Xie Y, Lu Y, Gu S. RGB-D Object Tracking with Occlusion Detection. In *International Conference on Computational Intelligence and Security*, 2019, 11–15.
- [36] Liu W, Tang X, Zhao C. Robust RGBD Tracking via Weighted Convolution Operators. *Sensors*, 2020, 20(8): 4496–4503.
- [37] Conaire CO, O'Connor NE, Cooke E, Smeaton AF. Comparison of Fusion Methods for Thermo-visual Surveillance Tracking. In *International Conference on Information Fusion*, 2006, 1–7.
- [38] Cvejic N, Nikolov SG, Knowles HD, Loza A, Achim A, Achim A, Canagarajah CN. The Effect of Pixel-Level Fusion on Object Tracking in Multi-Sensor Surveillance Video. In *IEEE Conference on Computer Vision and Pattern Recognition*, 2007, 1–7.
- [39] Conaire CO, O'Connor NE, Smeaton AF. Thermo-visual Feature Fusion for Object Tracking using Multiple Spatiogram Trackers. *Machine Vision and Applications*, 2008, 19(5): 483–494.
- [40] Birchfield S, Rangarajan S. Spatiograms Versus Histograms for Region-Based Tracking. In *IEEE Conference on Computer Vision and Pattern Recognition*, 2005, 1158–1163.
- [41] Chen S, Zhu W, Leung H. Thermo-Visual Video Fusion Using Probabilistic Graphical Model for Human Tracking. In *International Symposium on Circuits and Systems*, 2008, 1926–1929.
- [42] Liu H, Sun F. Fusion tracking in color and infrared images using joint sparse representation. *Information Sciences*, 2012, 55(3): 590–599.
- [43] Wu Y, Blasch E, Chen G, Bai L, Ling H. Multiple source data fusion via sparse representation for robust visual tracking. In *International Conference on Information Fusion*, 2011, 1–8.
- [44] Canny J. A Computational Approach to Edge Detection. *IEEE Transactions on Pattern Analysis and Machine Intelligence*, 1986, 8(6): 679–698.
- [45] Li C, Hu S, Gao S, Tang J. Real-Time Grayscale-Thermal Tracking via Laplacian Sparse Representation. In *ACM International Conference on Multimedia*, 2016, 54–65.
- [46] Li C, Cheng H, Hu S, Liu X, Tang J, Lin L. Learning Collaborative Sparse Representation for Grayscale-thermal Tracking. *IEEE Transactions on Image Processing*, 2016, 25(12): 5743–5756.
- [47] Li C, Zhao N, Lu Y, Zhu C, Tang J. Weighted Sparse Representation Regularized Graph Learning for RGB-T Object Tracking. In *ACM International Conference on Multimedia*, 2017, 1856–1864.
- [48] Li C, Sun X, Wang X, Zhang L, Tang J. Grayscale-Thermal Object Tracking via Multitask Laplacian Sparse Representation. *IEEE Transactions on Systems, Man, and Cybernetics: Systems*, 2018, 47(4): 673–681.
- [49] Lan X, Ye M, Zhang S, Yuen PC. Robust Collaborative Discriminative Learning for RGB-Infrared Tracking. In *AAAI Conference on Artificial Intelligence*, 2018, 7008–7015.
- [50] Lan X, Ye M, Zhang S, Zhou H, Yuen PC. Modality-correlation-aware Sparse Representation for RGB-infrared Object Tracking. *Pattern Recognition Letters*, 2018: 12–20.
- [51] Li C, Zhu C, Huang Y, Tang J, Wang L. Cross-Modal Ranking with Soft Consistency and Noisy Labels for Robust RGB-T Tracking. In *European Conference on Computer Vision*, 2018, 831–847.
- [52] Li C, Zhu C, Zheng S, Luo B, Tang J. Two-stage Modality-graphs Regularized Manifold Ranking for RGB-T Tracking. *Signal Processing: Image Communication*, 2018, 68: 207–217.
- [53] Li C, Zhu C, Zhang J, Luo B, Wu X, Tang J. Learning Local-Global Multi-Graph Descriptors for RGB-T Object Tracking. *IEEE Transactions on Circuits and Systems for Video Technology*, 2018, 29(10): 2913–2926.
- [54] Zhang X, Zhang X, Du X, Zhou X, Yin J. Learning Multi-domain Convolutional Network for RGB-T Visual Tracking. In *International Congress on Image and Signal Processing, BioMedical Engineering and Informatics*, 2018, 1–6.
- [55] Li C, Wu X, Zhao N, Cao X, Tang J. Fusing two-stream convolutional neural networks for RGB-T object tracking. *Neurocomputing*, 2018, 281: 78–85.
- [56] Wang Y, Li C, Tang J, Sun D. Learning Collaborative Sparse Correlation Filter for Real-Time Multispectral Object Tracking. In *International Conference on Brain Inspired Cognitive Systems*, 2018, 462–472.
- [57] Zhu Y, Li C, Luo B, Tang J, Wang X. Dense Feature Aggregation and Pruning for RGBT Tracking. In *ACM International Conference on Multimedia*, 2019, 465–472.
- [58] Luo C, Sun B, Yang K, Lu T, Yeh WC. Thermal Infrared and Visible Sequences Fusion Tracking based on a Hybrid Tracking Framework with Adaptive Weighting Scheme. *Infrared Physics and Technology*, 2019, 99: 265–276.
- [59] Lan X, Ye M, Shao R, Zhong B, Yuen PC, Zhou H. Learning Modality-Consistency Feature Templates: A Robust RGB-Infrared Tracking System. *IEEE Transactions on Industrial Electronics*, 2019, 66(12): 9887–9897.
- [60] Li C, Lu A, Zheng A, Tu Z, Tang J. Multi-Adapter RGBT Tracking. In *IEEE International Conference on Computer Vision Workshop*, 2019, 2262–2270.
- [61] Yang R, Zhu Y, Wang X, Li C, Tang J. Learning Target-Oriented Dual Attention For Robust RGB-T Tracking. In *IEEE International Conference on Image Processing*, 2019, 3975–3979.
- [62] Gao Y, Li C, Zhu Y, Tang J, He T, Wang F. Deep Adaptive Fusion Network for High Performance RGBT Tracking. In *IEEE International Conference on Computer Vision Workshop*, 2019, 91–99.
- [63] Zhang L, Danelljan M, Gonzalez-Garcial A, van de Weijer J,

- Khan FS. Multi-Modal Fusion for End-to-End RGB-T Tracking. In *IEEE International Conference on Computer Vision Workshop*, 2019, 2252–2261.
- [64] He K, Zhang X, Ren S, Sun J. Deep Residual Learning for Image Recognition. In *IEEE Conference on Computer Vision and Pattern Recognition*, 2016, 770–778.
- [65] Lan X, Ye M, Shao R, Zhong B. Online Non-Negative Multi-Modality Feature Template Learning for RGB-Assisted Infrared Tracking. *Access*, 2019, 7: 67761–67771.
- [66] Wang C, Xu C, Cui Z, Zhou L, Zhang T, Zhang X, Yang J. Cross-Modal Pattern-Propagation for RGB-T Tracking. In *IEEE Conference on Computer Vision and Pattern Recognition*, 2020, 7062–7071.
- [67] Zhang H, Zhang L, Zhuo L, Zhang J. Object Tracking in RGB-T Videos Using Modal-Aware Attention Network and Competitive Learning. *Sensors*, 2020, 20(2).
- [68] Li C, Liu L, Lu A, Ji Q, Tang J. Challenge-Aware RGBT Tracking. In *European Conference on Computer Vision*, 2020, 222–237.
- [69] Zhang P, Zhao J, Bo C, Wang D, Lu H, Yang X. Jointly Modeling Motion and Appearance Cues for Robust RGB-T Tracking. *IEEE Transactions on Image Processing*, 2021, 30: 3335–3347.
